# Supplementary material
Source: PubMed Central journal article supplement (PMC6193250)
Supplement: ac8b01378_si_001.pdf [file ac8b01378_si_001.pdf]

## Supporting information

### **Cross-species molecular imaging of bile salts and lipids in liver: identification of molecular structural markers in health and disease.**

Bryn Flinders<sup>1</sup>, Lennart R. S. Huizing<sup>1</sup>, Marjolein van Heerden<sup>2</sup>, Filip Cuyckens<sup>2</sup>, Ulf P. Neumann<sup>3,4</sup>, Luc J. W. van der Laan<sup>5</sup>, Steven W. M. Olde Damink<sup>3,4</sup>, Ron M. A. Heeren<sup>1\*</sup>, Frank G. Schaap<sup>3,4</sup>, Rob J. Vreeken<sup>1,2</sup>

<sup>1</sup> Maastricht Multimodal Molecular Imaging Institute (M4I), University of Maastricht, Universiteitssingel 50, 6229 ER Maastricht, The Netherlands

<sup>2</sup> Janssen Research & Development, Turnhoutseweg 30, 2340 Beerse, Belgium

<sup>3</sup> Department of Surgery, Maastricht University Medical Center and NUTRIM School of Nutrition and Translational Research in Metabolism, Maastricht University, Maastricht, The Netherlands

<sup>4</sup> Department of General, Visceral and Transplantation Surgery, RWTH University Hospital Aachen, Aachen, Germany

<sup>5</sup> Erasmus MC, University Medical Center Rotterdam, Department of Surgery, Postbus 2040, 3000 CA Rotterdam, The Netherlands.

\*Corresponding author: Professor Ron M. A. Heeren, Telephone +31433881499, Fax +31433884154, E-mail address [r.heeren@maastrichtuniversity.nl](mailto:r.heeren@maastrichtuniversity.nl)

## Table of Contents

|                                                                                                                    |       |
|--------------------------------------------------------------------------------------------------------------------|-------|
| Staining protocols .....                                                                                           | S3-4  |
| Figure S1. Information on bile acids .....                                                                         | S5    |
| Figure S2. MALDI-MS/MS spectra of deprotonated ([M-H] <sup>-</sup> ) bile acid standards in negative ion mode..... | S6    |
| Figure S3. MALDI-IMS-MS of isomeric bile acids in negative ion mode .....                                          | S7    |
| Figure S4. Multimodal imaging of healthy dog liver tissue in positive ion mode.....                                | S8    |
| Figure S5. MALDI-MS/MS spectra of structural molecular markers .....                                               | S9-10 |
| Figure S6. Multimodal imaging of healthy human liver tissue in positive ion mode.....                              | S11   |
| Figure S7. Multimodal imaging of liver from a patient with PSC in positive ion mode.....                           | S12   |
| Figure S8. MALDI-MS/MS spectra of 5-CS and G(C)DCA-S.....                                                          | S13   |
| Figure S9. Multimodal imaging of additional liver tissue of cases of severe PSC .....                              | S14   |

|                                                                                                       |     |
|-------------------------------------------------------------------------------------------------------|-----|
| Figure S10. Immunohistochemical staining of liver tissue of cases of severe PSC .....                 | S15 |
| Figure S11. ROC analysis of bile acids in healthy liver and liver tissue of cases of severe PSC ..... | S16 |
| Figure S12. Multimodal imaging of healthy rat liver in negative ion mode.....                         | S17 |
| Figure S13. Multimodal imaging of healthy rat liver in positive ion mode .....                        | S18 |
| Table S1. Serum biochemistry of PSC patients.....                                                     | S19 |
| Table S2. Identified lipids in positive ion mode.....                                                 | S20 |
| Table S3. Identified lipids in negative ion mode.....                                                 | S21 |
| Table S4. ROC values for other molecular markers.....                                                 | S22 |

## Special staining of frozen tissue sections

### HE

- Fixation: 10 minutes in formalin 10% at 4°C
- Airdry, staining on room temperature
- Dip in demin water
- Haematoxyline Gill III (Prosan)(or Harris): 2 minutes
- Tap water: 8 dips
- Demin water: 8 dips
- Phosphotungstic acid 2 %: 4 dips
- Demin water: 8 dips
- Sodiumacetate 2%: 4 dips
- Demin water: 8 dips
- Eosin 1% (Prosan): 1 min
- Ethanol 96 %: 2 x 8 dips
- Ethanol absolute: 2 x 8 dips
- Xylene: 2 x 1 minute
- Mount with synthetic mounting medium

### Masson's Trichrome

#### Preparation of reagents

- Ponceau de xyloidine 1 %: solve 3 g of Ponceau de Xylidine in 300 ml cooking demin water and let it cook for 1 or 2 minutes, then add 3 ml acetic acid and filter the solution.
- Acid anilin blue 0.5 %: solve 1 g of anilin blue in 200 ml demin water. Add 4 ml acetic acid.
- Phosphotungstic acid 3 %: solve 6 g of phosphotungstic acid in 200 ml demin water.
- Acetic acid 1 %: dilute 2 ml acetic acid in 200 ml demin water
- Mayer's haematoxylin: bought solution (Sigma Aldrich)

#### Staining:

- Fixation: 10 minutes in formalin 10 % at 4°C
- Airdry, staining on room temperature
- Mayer's haematoxylin: 10 minutes
- Running tap water: 10 minutes
- Rinse in demin water
- Phosphotungstic acid 3 %: 7 minutes
- Rinse in demin water
- Acid anilin blue 0.5 %: 4 minutes
- Acetic acid solution 1 %: dip a few times
- Ethanol 96 %: 2 x 2 minutes
- Ethanol absolute: 2 x 2 minutes
- Xylene: 2 x 2 minutes
- Mount with synthetic mounting medium

## Immunohistochemistry

- Dry slides: 15-30 minutes
- Fix section: 10 minutes in acetone -20°C
- Rinse with PBS
- Encircle tissue section with DAKO-Cytomation pen
- Rinse with PBS
- Block endogenous peroxidases with 0.3% H<sub>2</sub>O<sub>2</sub> in methanol: 30 minutes  
1 ml 30% H<sub>2</sub>O<sub>2</sub> + 100 ml methanol
- Rinse with PBS: 3 x 3 minutes
- Block with 5% BSA-PBS: 30 minutes  
2 ml PBS + 2 ml 10% BSA
- Incubate with 1:2000  $\alpha$ -Cytokeratin (DAKO Z0622) in DB: 1 hour
- Rinse with PBS: 3 x 3 minutes
- Incubate with 1:500 Goat- $\alpha$ -Rabbit-HRP in DB: 1 hour
- Rinse with PBS: 3 x 3 minutes
- Incubate with AEC  
19 ml 0.5M NaAc  
171 ml with MQ  
9 ml DMSO  
Before use; add 69  $\mu$ l H<sub>2</sub>O<sub>2</sub> + 1 ml 4% DMSO-AEC
- Rinse with demi water:  $\pm$  5 minutes
- Stain with Haematoxylin GIII staining: 1-2 min (liver)
- Rinse with tap water:  $\pm$  5 minutes
- Dry slides
- Mount with DAKO Faramount aqueous mounting medium ready-to-use S3025

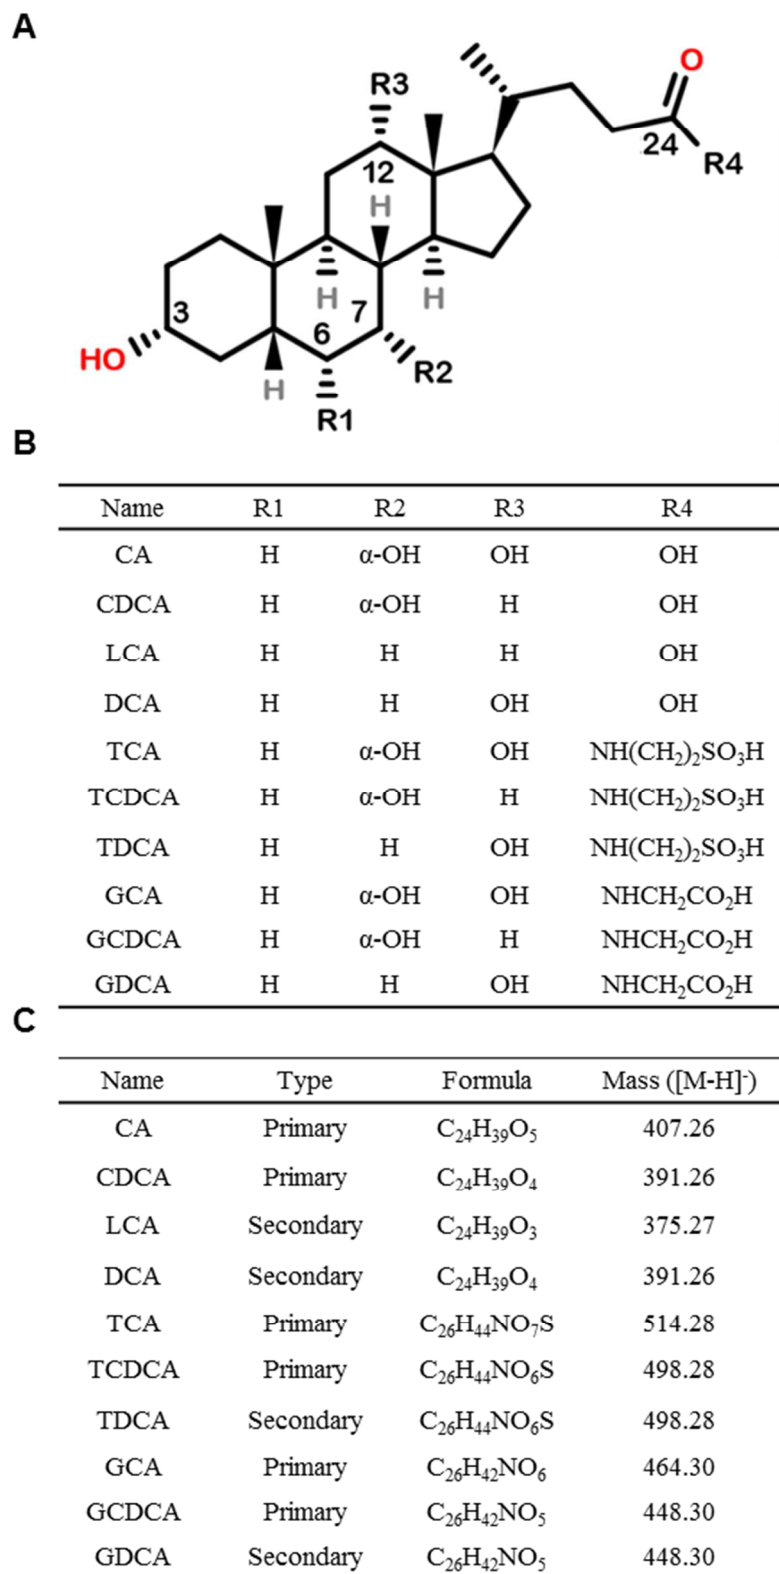

**Figure S1.** Information on bile acids. (A) Base structure of bile acids and (B) positions of the hydroxyl groups and site of conjugation. (C) Observed masses of bile acid standards in negative ion mode.

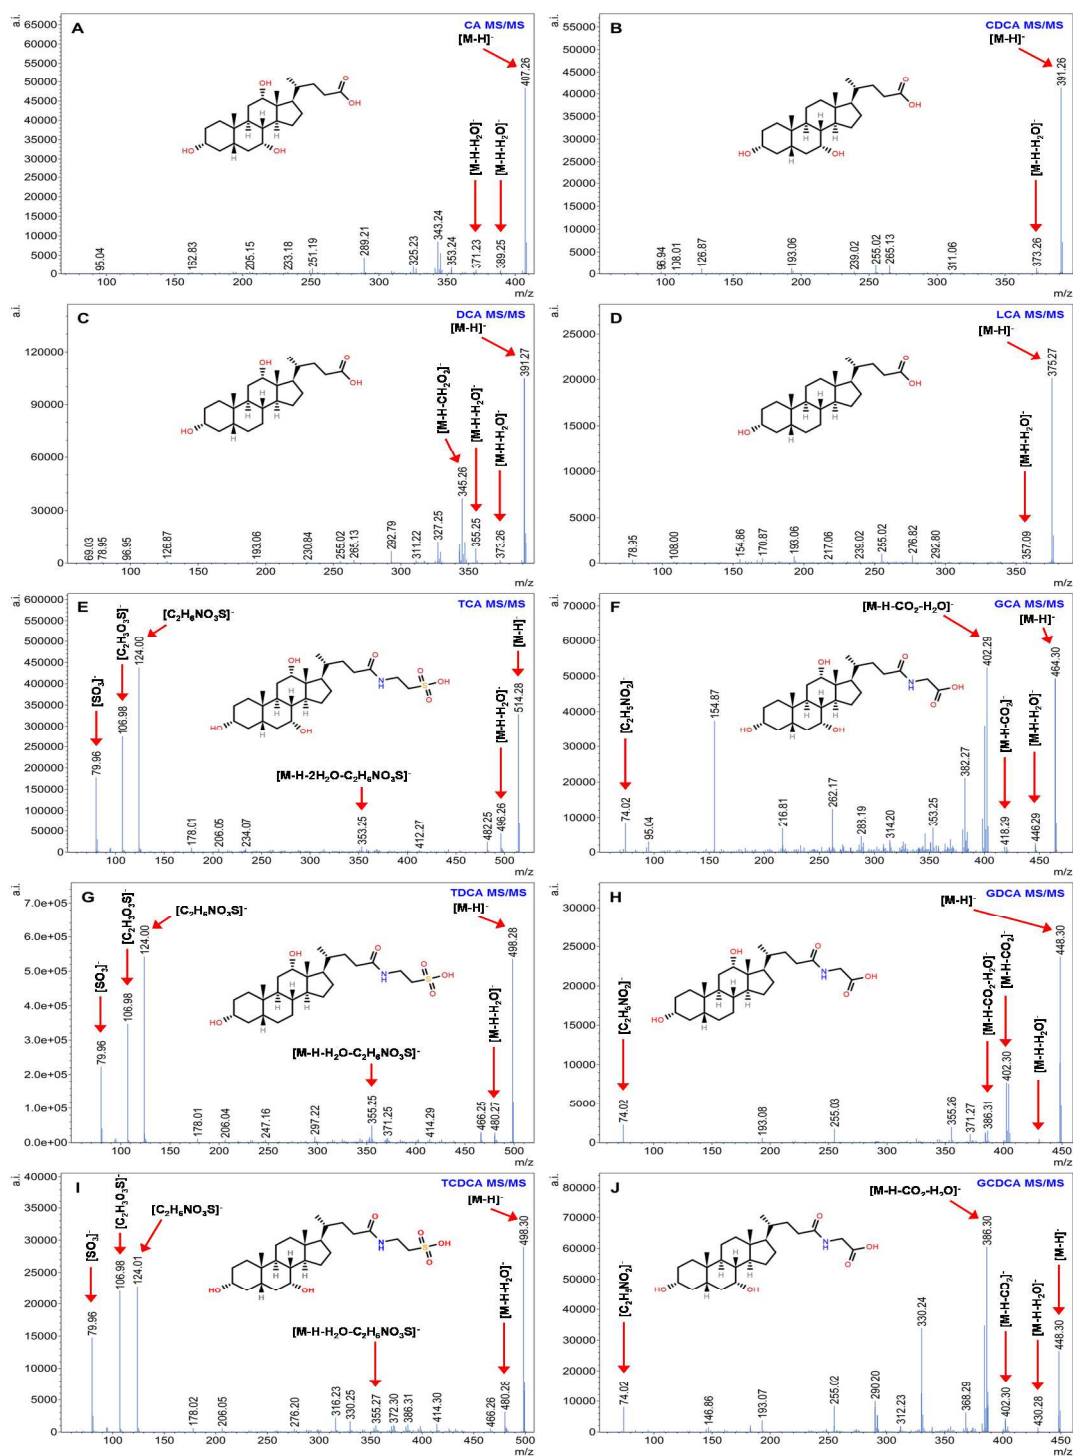

**Figure S2.** MALDI-MS/MS spectra of deprotonated ( $[M-H]^-$ ) bile acid standards in negative ion mode. (A) cholic acid ( $m/z$  407.26), (B) chenodeoxycholic acid ( $m/z$  391.27), (C) deoxycholic acid ( $m/z$  391.27), (D) lithocholic acid ( $m/z$  375.27), (E) taurocholic acid ( $m/z$  514.28), (F) glycocholic acid ( $m/z$  464.30), (G) taurodeoxycholic acid ( $m/z$  498.30), (H) glycodeoxycholic acid ( $m/z$  448.30), (I) taurochenodeoxycholic acid ( $m/z$  498.30), (J) glycochenodeoxycholic acid ( $m/z$  448.30).

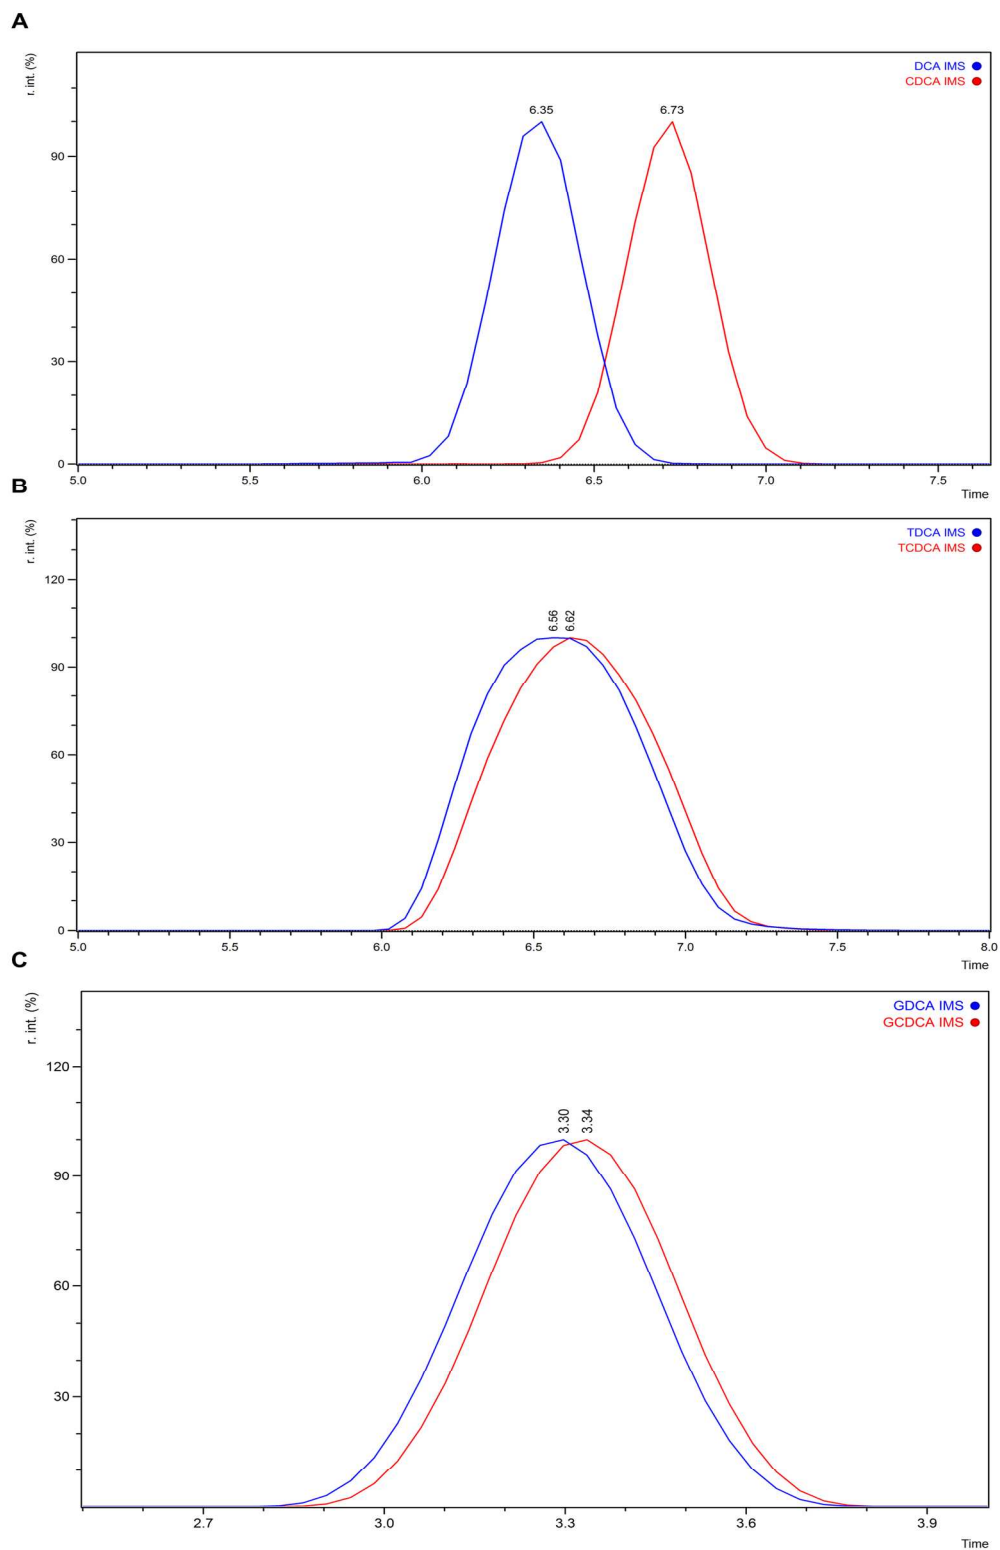

**Figure S3.** MALDI-IMS-MS of isomeric bile acids in negative ion mode. Mobilograms of (A) DCA/CDCA ( $m/z$  391.27), (B) TDCA/TCDCA ( $m/z$  498.28) and (C) GDCA/GCDCA ( $m/z$  448.30).

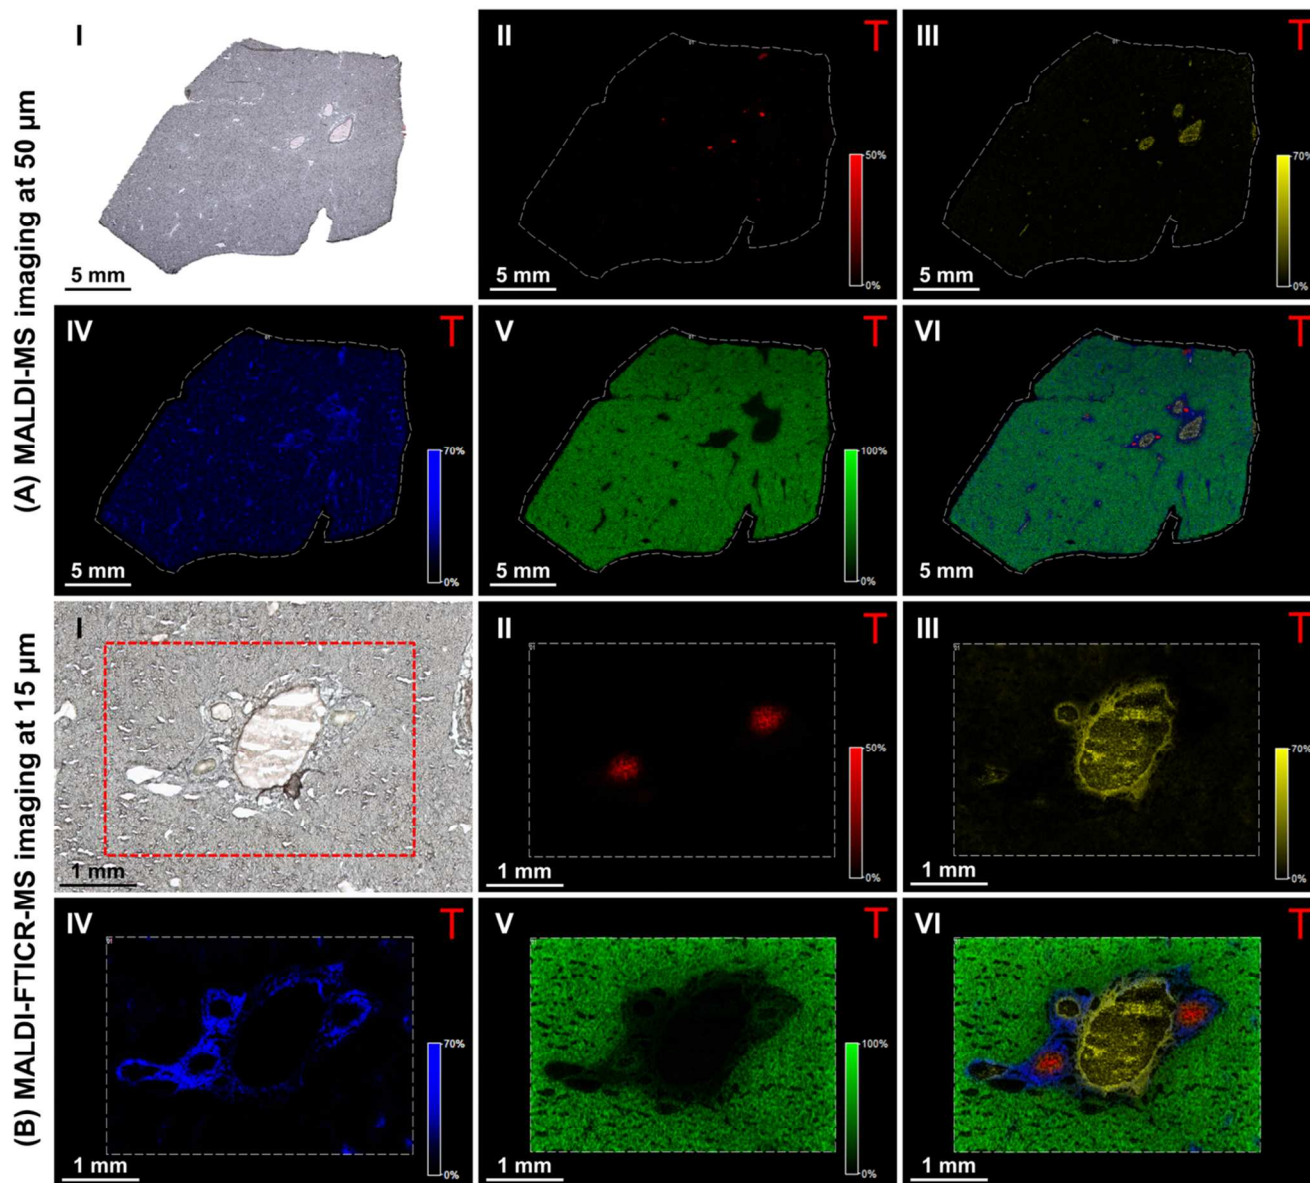

**Figure S4.** Multimodal imaging of healthy dog liver tissue. (I) Optical image of the tissue section prior to matrix application. Positive-ion mode (A) MALDI-MS and (B) MALDI-FTICR-MS images showing the distribution of selected molecular species in the (II) bile duct lumen (unknown at  $m/z$  576.2418), (III) blood vessels (heme  $[M]^+$  at  $m/z$  616.1804), (IV) connective tissue ( $[PC(32:0)+K]^+$  at  $m/z$  772.5254), (V) parenchyma ( $[PC(38:4)+K]^+$  at  $m/z$  848.5564) and (VI) overlay of the selected species. (Designated masses are from MALDI-FTICR-MS imaging measurements, MALDI-MS image field of view 141828 pixels, area 124 mm<sup>2</sup> and spatial resolution 50  $\mu\text{m}$ , MALDI-FTICR-MS image field of view 41700 pixels, 9.3 mm<sup>2</sup> area and spatial resolution 15  $\mu\text{m}$ . Both images normalized with TIC).



**A**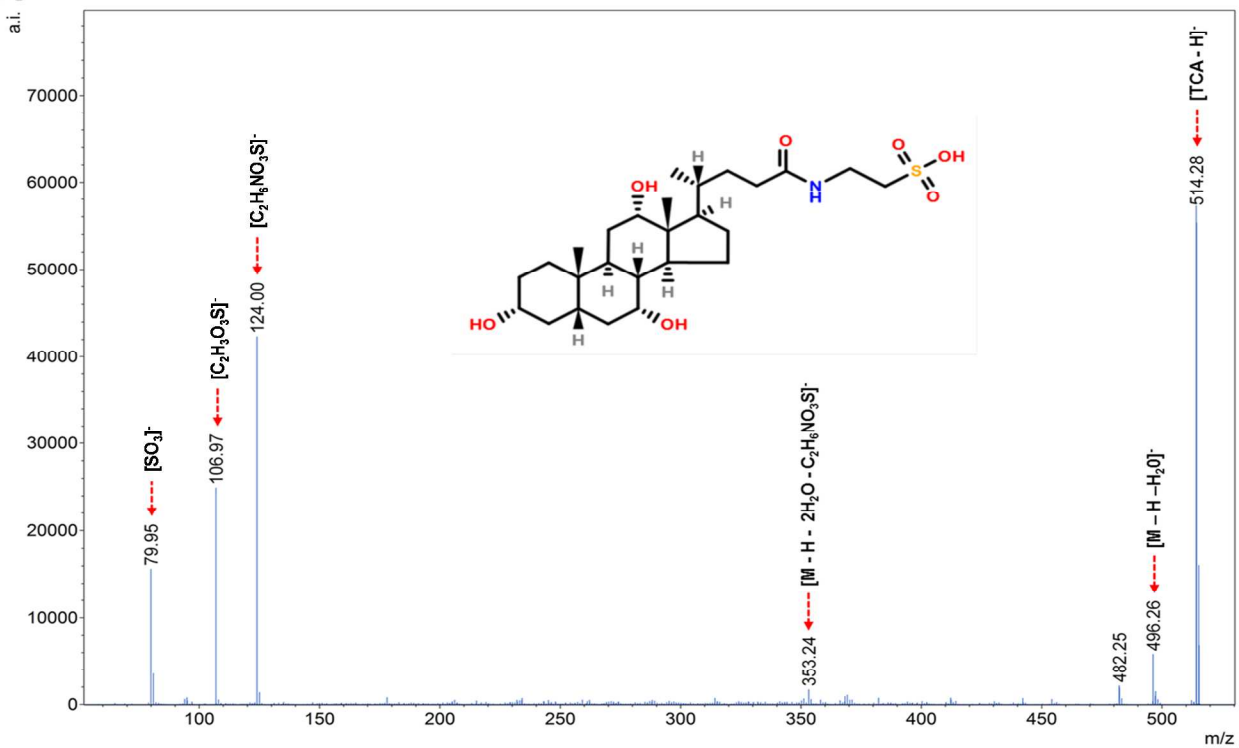**B**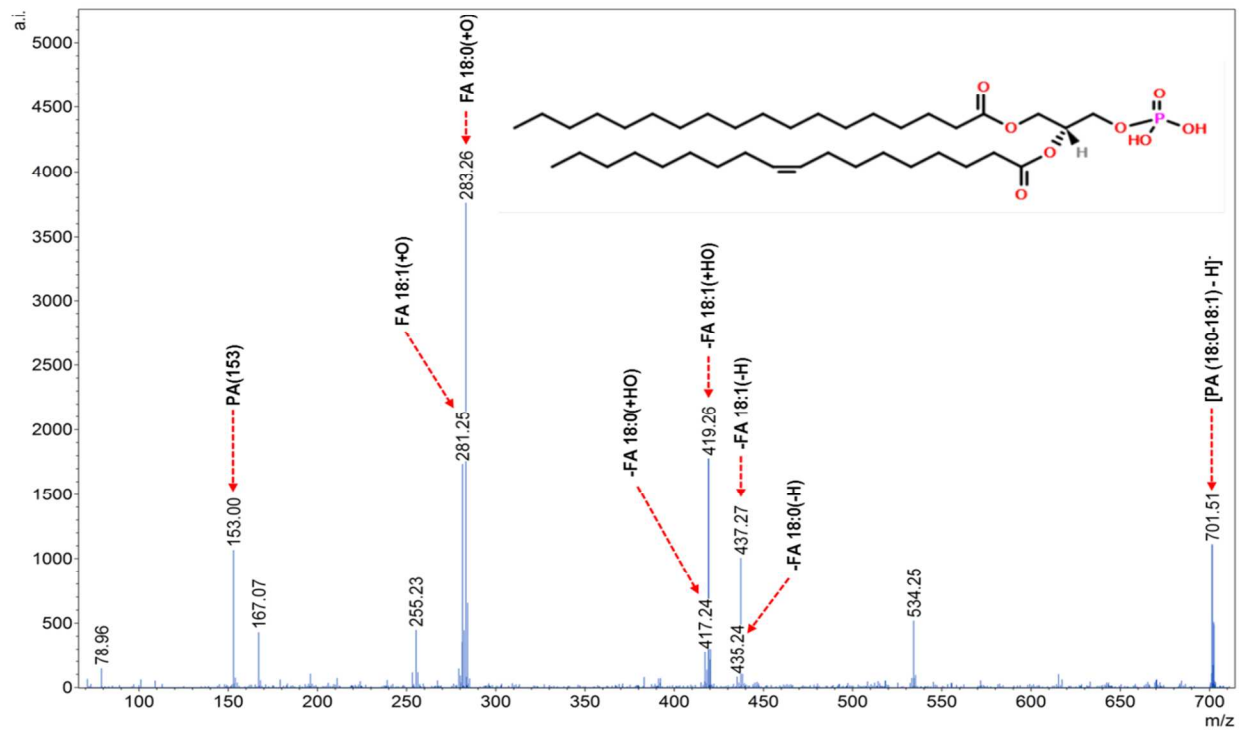

**C**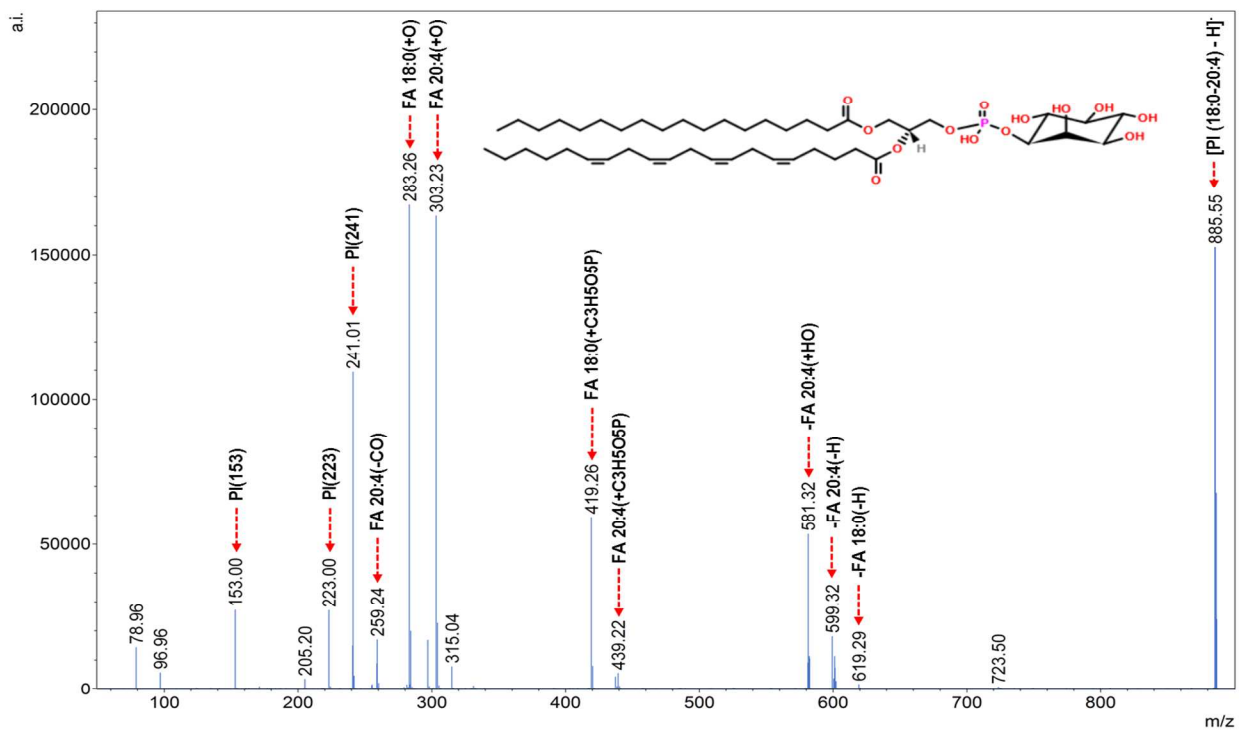**D**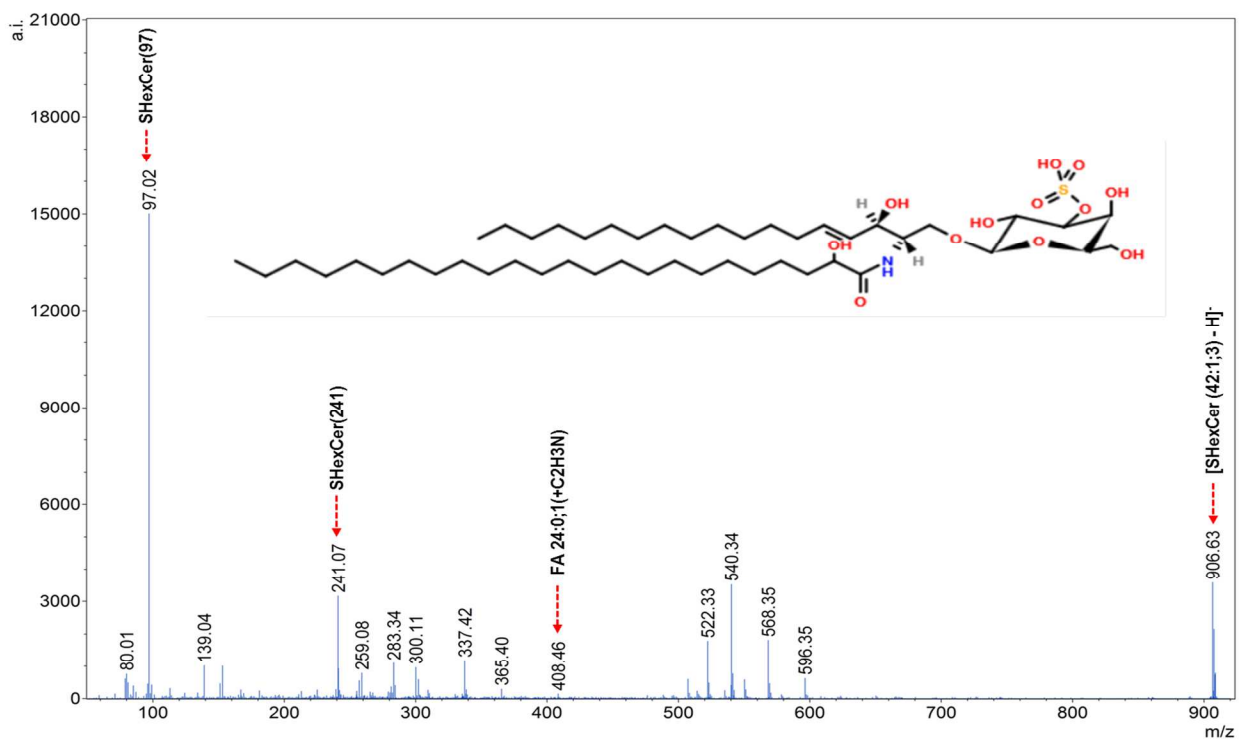

**Figure S5.** MALDI-MS/MS spectra of structural molecular markers for (A) bile duct lumen, (B) connective tissue, (C) parenchyma and (D) bile duct. Spectra obtained from healthy dog liver tissue.

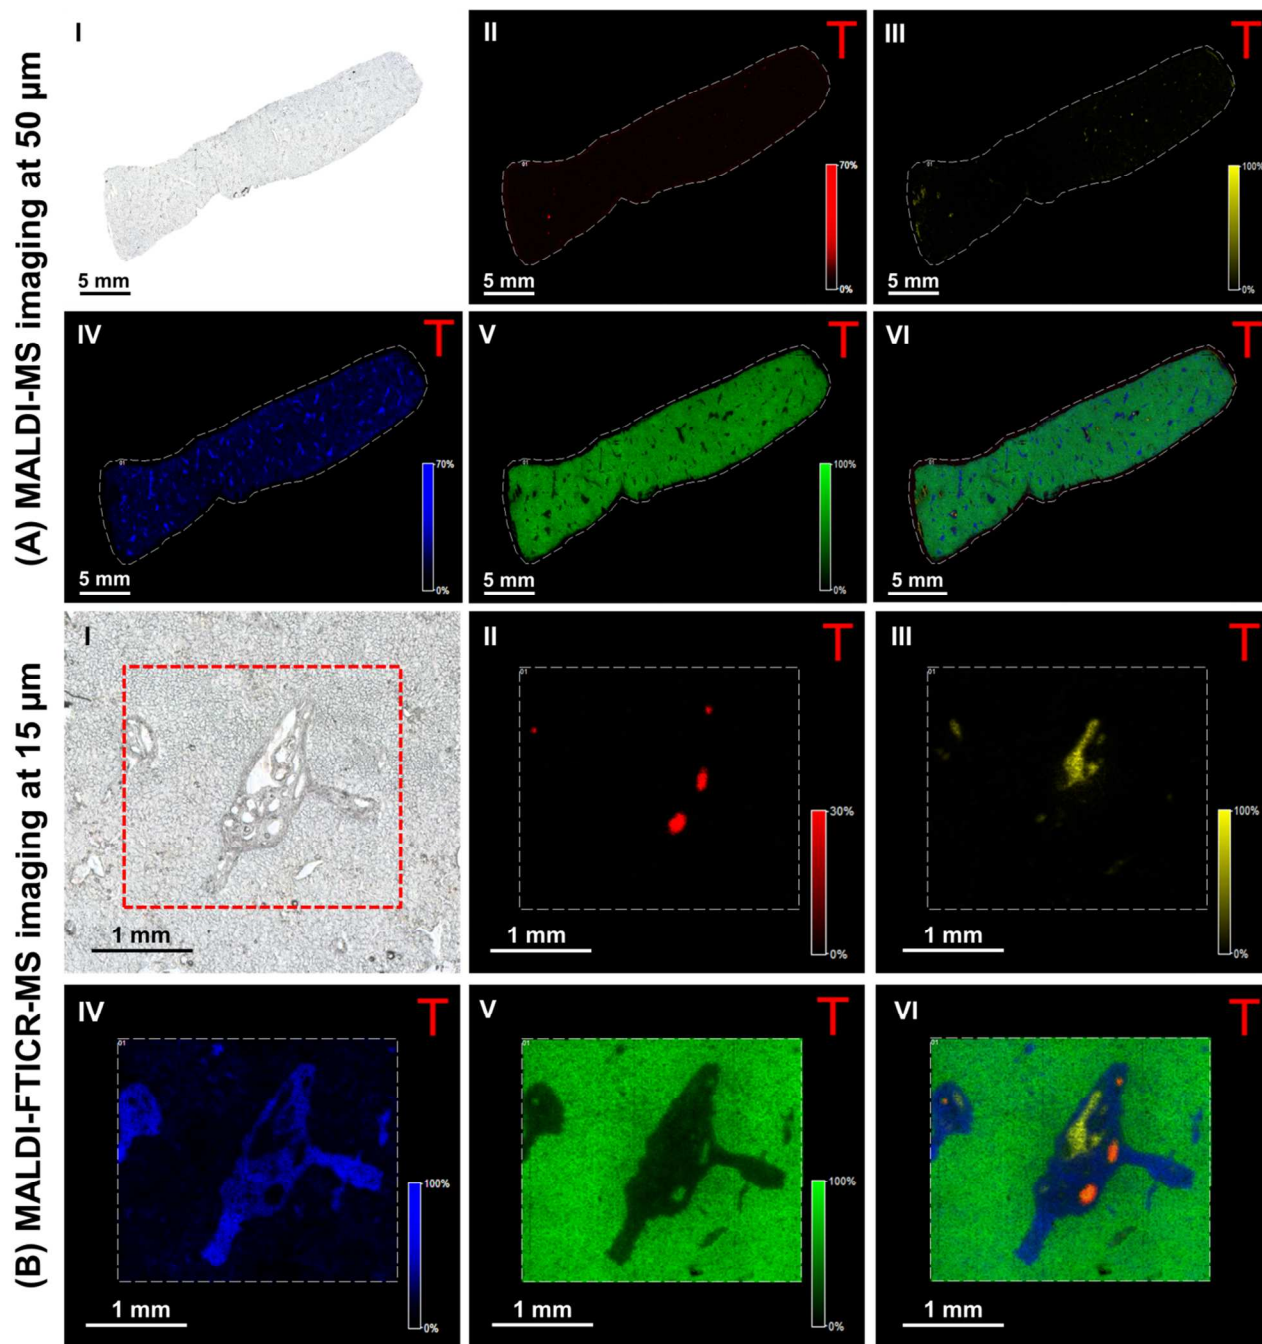

**Figure S6.** Multimodal imaging of healthy human liver tissue. (I) Optical image of tissue section prior to matrix application. Positive-ion mode (A) MALDI-MS and (B) MALDI-FTICR-MS images showing the distribution of selected molecular species in the (II) bile duct lumen (unknown at  $m/z$  560.2427), (III) blood vessels (heme  $[M]^+$  at  $m/z$  616.1782), (IV) connective tissue ( $[PC(32:0)+K]^+$  at  $m/z$  772.5254), (V) parenchyma ( $[PC(34:2)+K]^+$  at  $m/z$  796.5252) and (VI) overlay of the selected species. (Designated masses are from MALDI-FTICR-MS imaging measurements, MALDI-MS image field of view 72058 pixels, area 110  $\text{mm}^2$  and spatial resolution 50  $\mu\text{m}$ , MALDI-FTICR-MS image field of view 22338 pixels, 5  $\text{mm}^2$  area and spatial resolution 15  $\mu\text{m}$ . Images normalized with TIC).

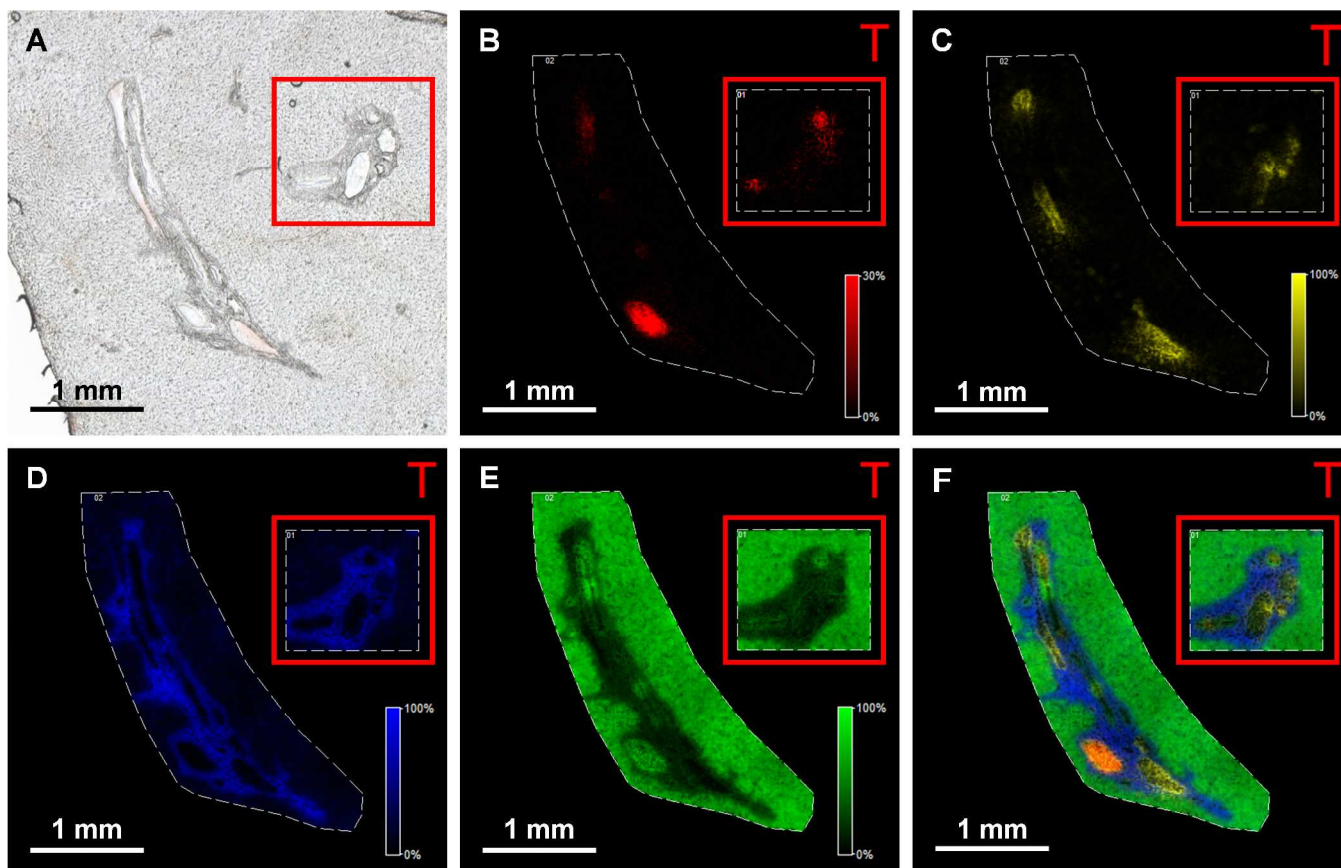

**Figure S7.** Multimodal imaging of liver from a patient with mild PSC (case 1). (A) Optical image of tissue section prior to matrix application. Positive-ion mode MALDI-FTICR-MS images showing the distribution of selected molecular species in the (B) bile duct lumen (unknown at  $m/z$  560.2434), (C) heme ( $[M]^+$ ) at  $m/z$  616.1804, (D) connective tissue ( $[PC (32:0)+K]^+$  at  $m/z$  772.5251), (E) parenchyma ( $[PC (34:2)+K]^+$  at  $m/z$  796.5254) and (F) overlay of the selected species. (Designated masses are from MALDI-FTICR-MS imaging measurements, field of view 20238 pixels, area  $10 \text{ mm}^2$  and spatial resolution  $15 \mu\text{m}$ . Images normalized with TIC).

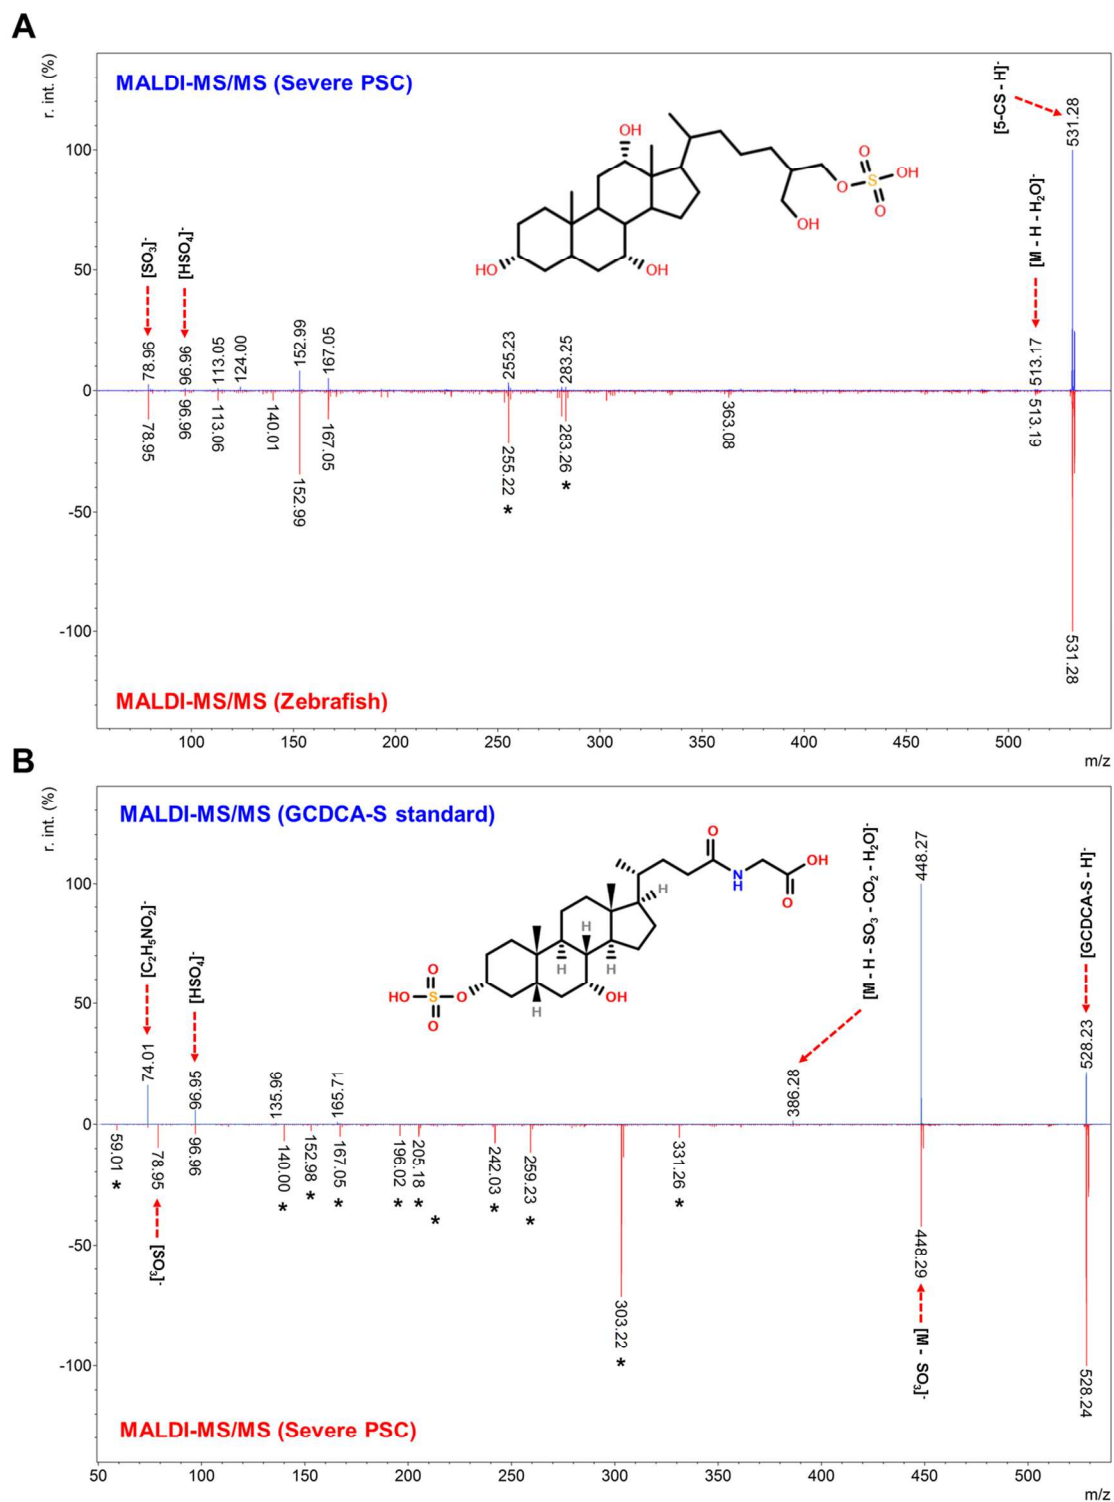

**Figure S8.** MALDI-MS/MS spectra of 5-CS and GCDCA-S in negative ion mode. A) MALDI-MS/MS spectra of 5-CS at *m/z* 531.3 obtained from severe PSC liver (blue) and whole-body zebrafish (red) tissue sections. B) MALDI-MS/MS spectra of G(C)DCA-S at *m/z* 528.2 obtained from pure standard (blue) and severe PSC liver tissue section (red). \* indicated peaks come from unidentified endogenous species tentatively identified as fatty acids.

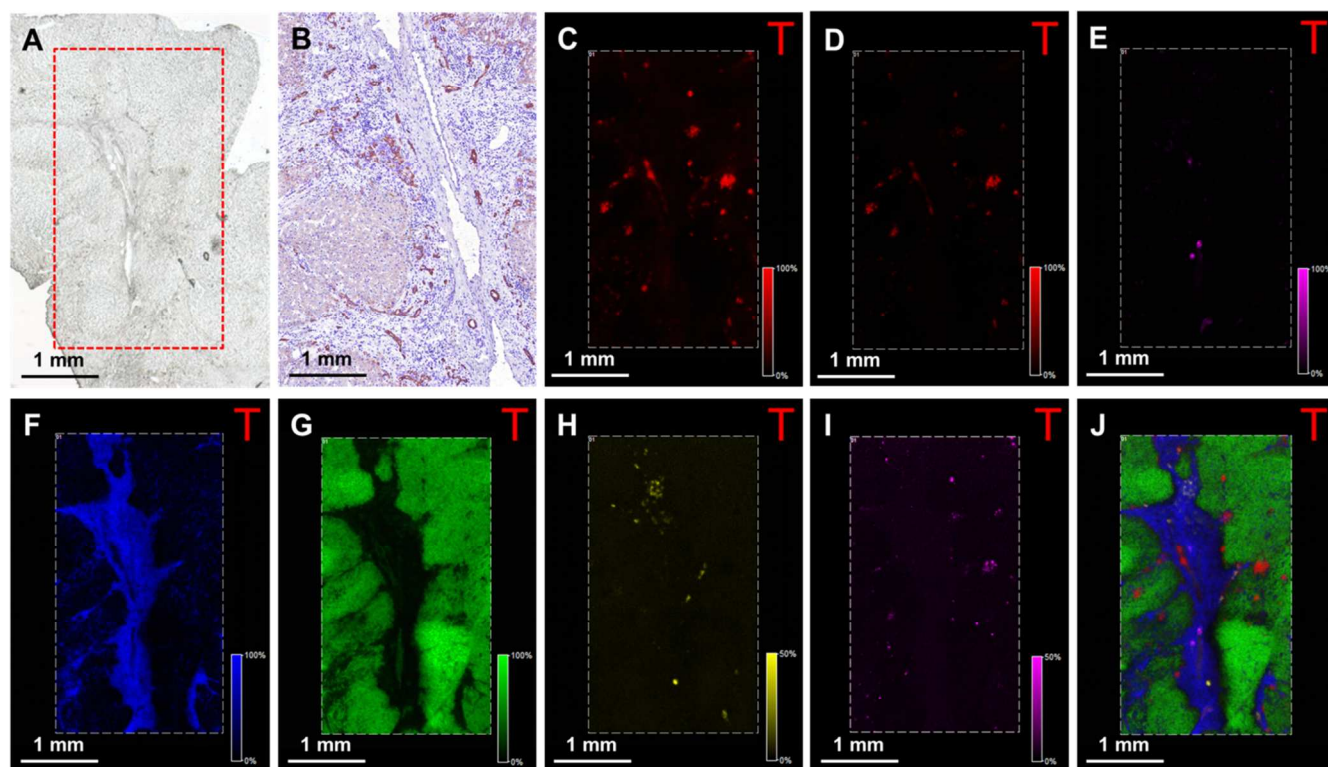

**Figure S9.** Comparison of immunohistochemical stain and MALDI-MS images from a patient with severe PSC (case 2). (A) Optical image of tissue section prior to matrix application and (B) cytokeratin staining of a consecutive tissue section. Negative-ion mode MALDI-MS images showing the distribution of (C) [TCA-H]<sup>-</sup> at  $m/z$  514.28, (D) 5-cyprinolsulfate ([M-H]<sup>-</sup>) at  $m/z$  531.30, (E) heme ([M-H]<sup>-</sup>) at  $m/z$  615.17, (F) [PA (18:0\_18:1)-H]<sup>-</sup> at  $m/z$  701.51, (G) [PI (18:0\_20:4)-H]<sup>-</sup> at  $m/z$  885.55, (H) [ST-OH (18:1\_24:0)-H]<sup>-</sup> at  $m/z$  906.63 and (I) bilirubin diglucuronide ([M-H]<sup>-</sup>) at  $m/z$  935.32. (J) Overlay of the selected species. (Field of view 81186 pixels, area 8 mm<sup>2</sup> and spatial resolution 10 μm. Images normalized with TIC).

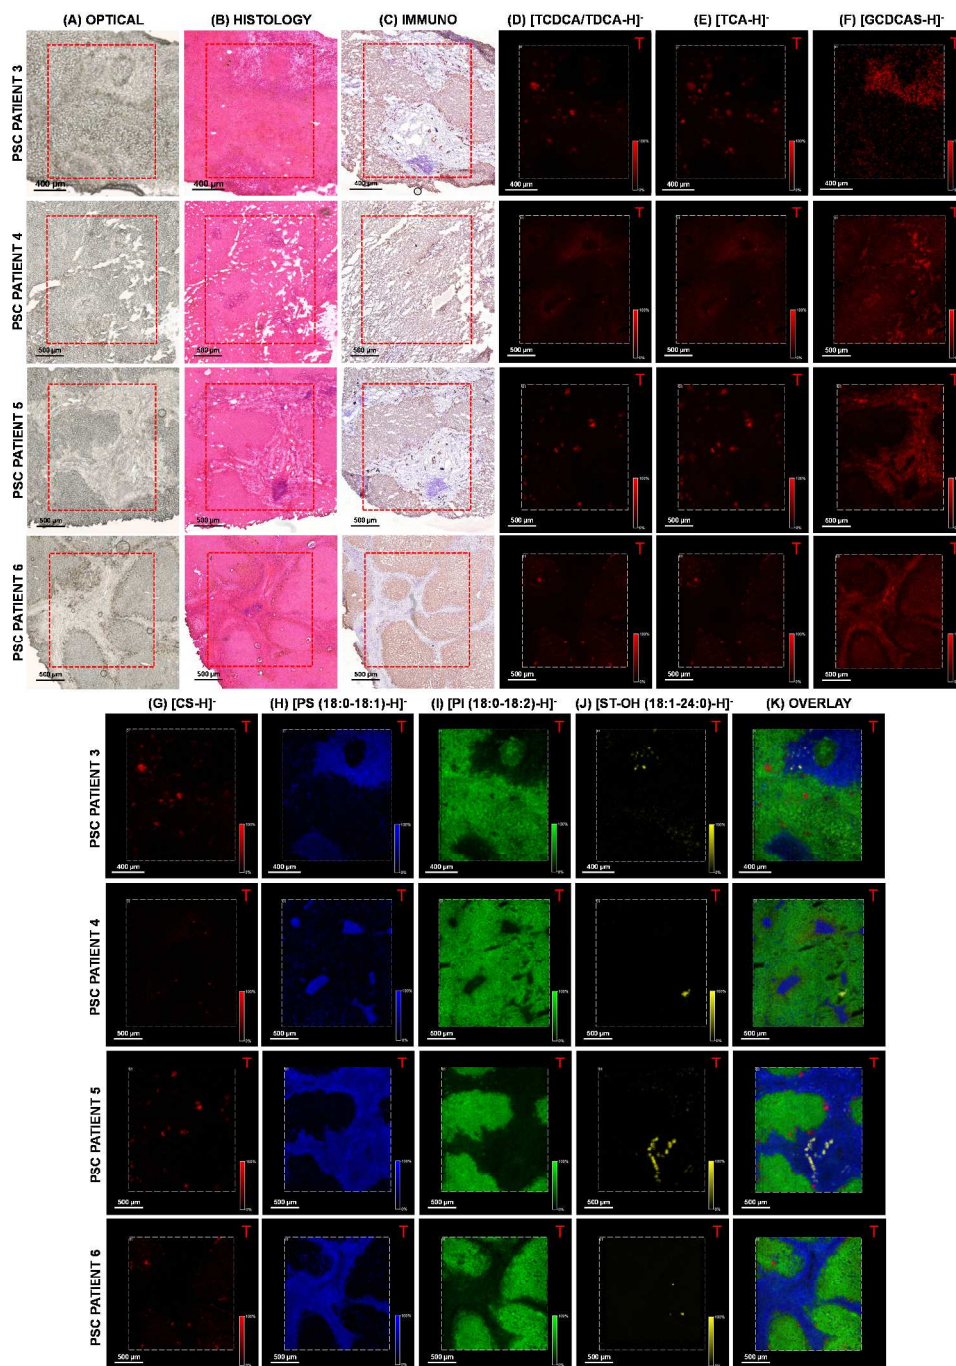

**Figure S10.** Multimodal imaging of liver tissue from patients with severe PSC (cases 3-6). (A) Optical image of tissue section prior to matrix application, (B) H&E staining of tissue sections post imaging and (C) cytokeratin staining of a consecutive tissue section. Negative-ion mode MALDI-FTICR-MS images showing the distribution of (D) [TCDCA/TDCA-H]<sup>-</sup> at  $m/z$  498.2896, (E) [TCA-H]<sup>-</sup> at  $m/z$  514.2844, (F) [G(C)DCAS-H]<sup>-</sup> at  $m/z$  528.2639, (G) [5-CS-H]<sup>-</sup> at  $m/z$  531.2998, (H) [PS (18:0\_18:1)-H]<sup>-</sup> at  $m/z$  788.5449, (I) [PI (18:0\_18:2)-H]<sup>-</sup> at  $m/z$  861.5502, (J) [ST-OH (18:1\_24:0)-H]<sup>-</sup> at  $m/z$  906.6352 and (K) overlay of the selected species. (PSC 1-4 fields of view 10356, 25482, 18987 and 21872 pixels and areas 2.3, 5.7, 4.2 and 4.8 mm<sup>2</sup> respectively. Spatial resolution of all images 15  $\mu$ m, normalized with TIC).

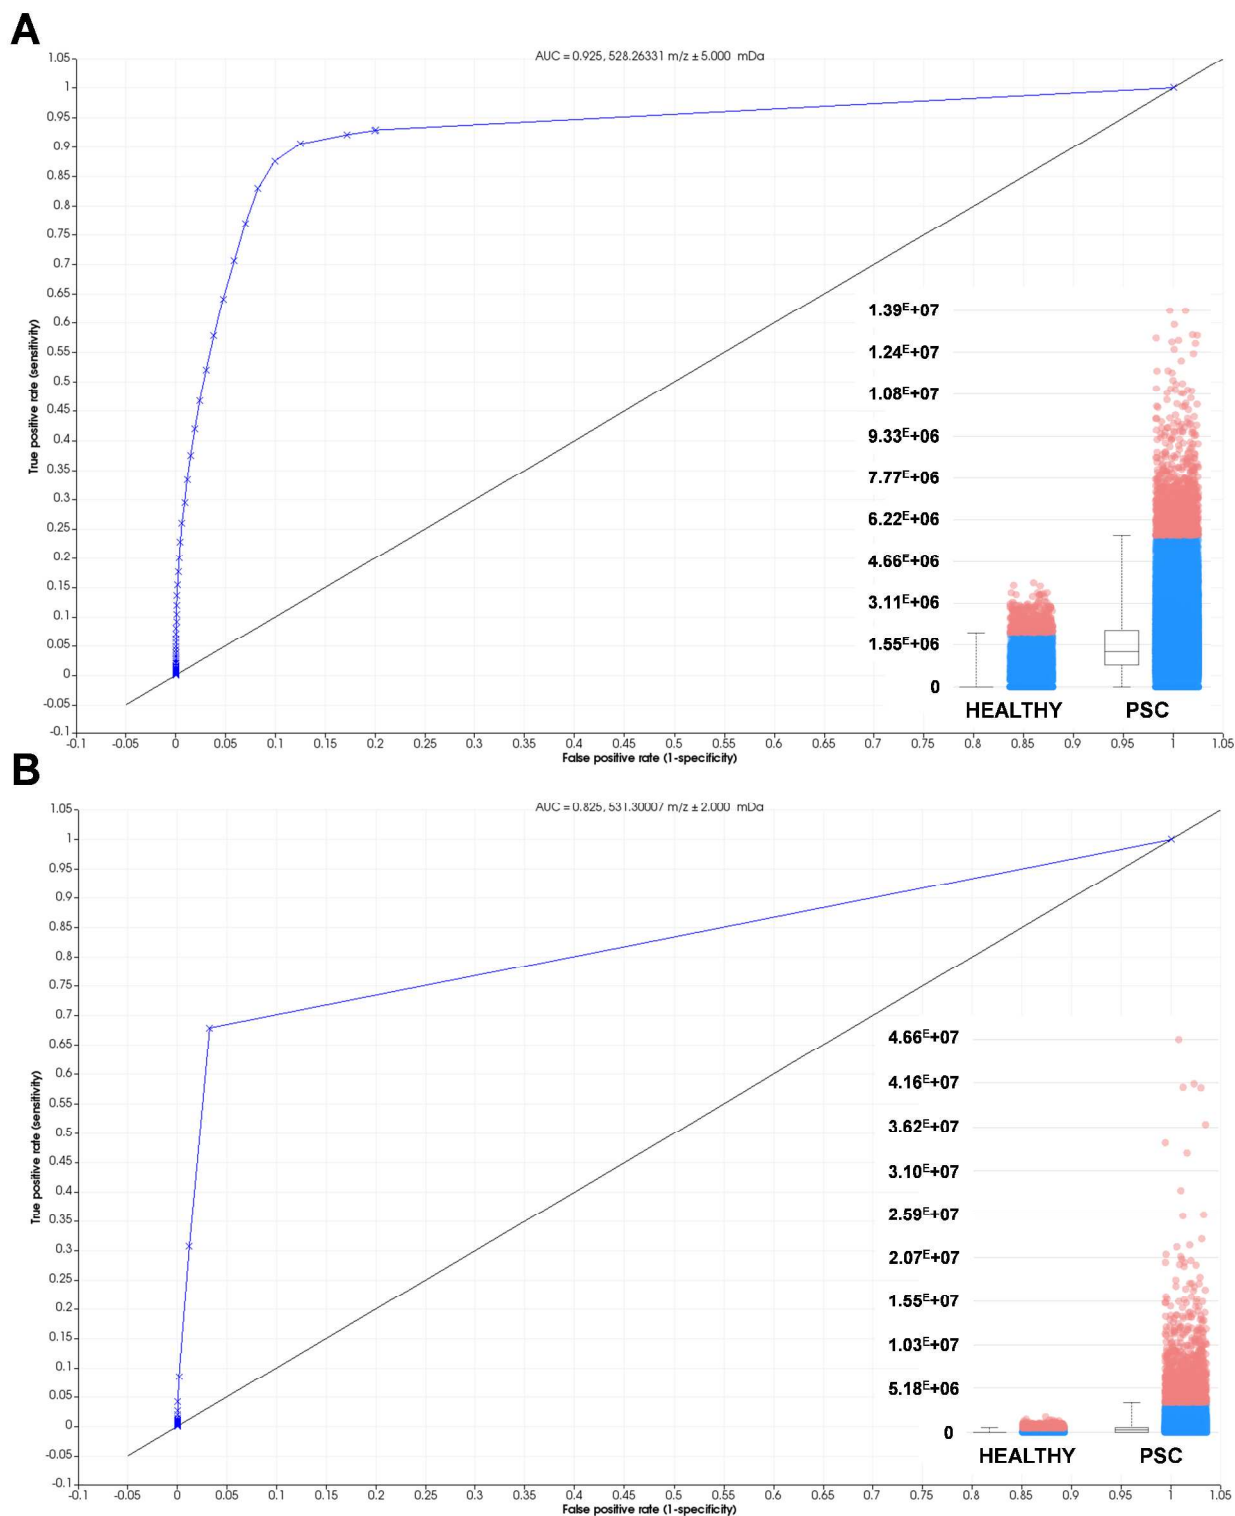

**Figure S11.** Receiver operating characteristic (ROC) analysis of A) G(C)DCA-S at  $m/z$  528.2642 and B) 5-CS at  $m/z$  531.2999 from healthy liver tissue and tissue from severe PSC cases. Inserts show the relative ion intensity of the displayed ions.



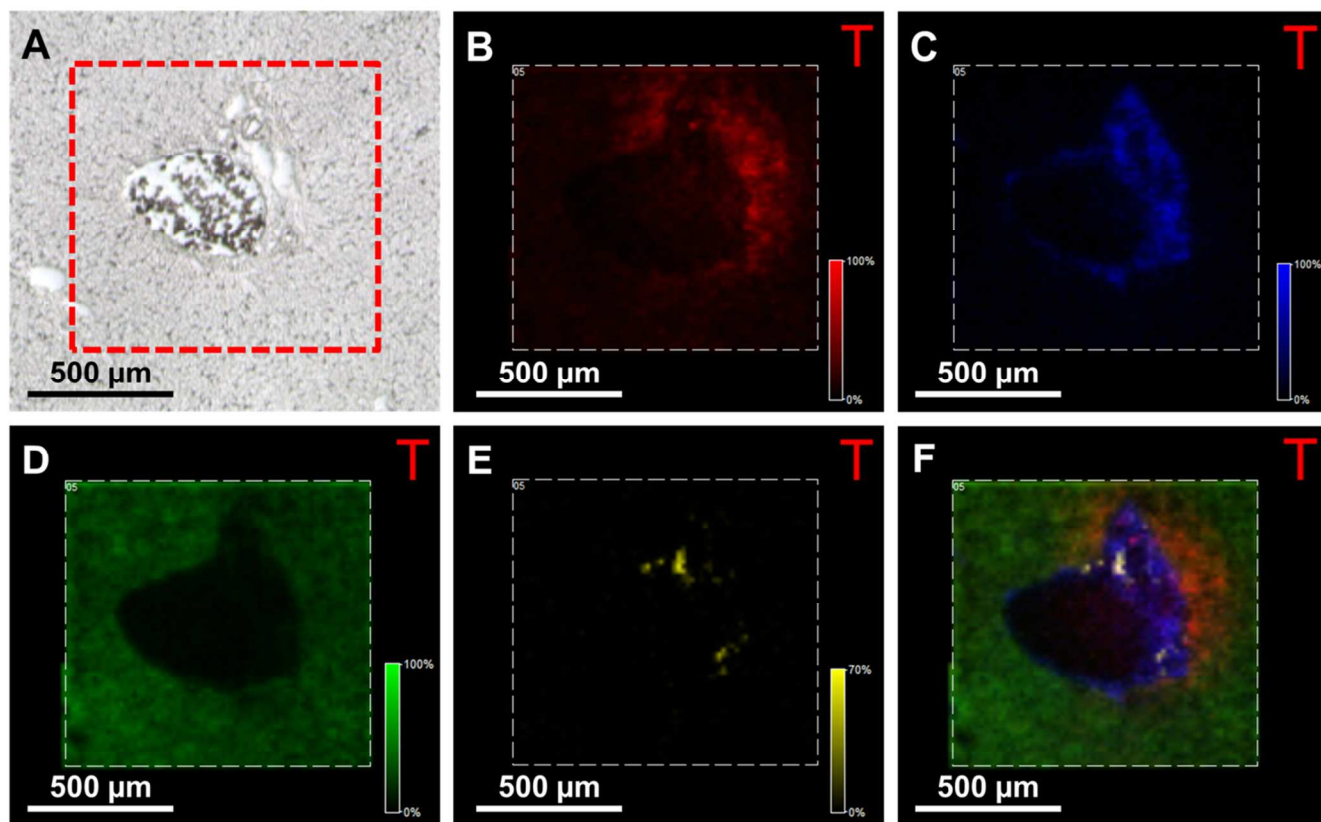

**Figure S12.** MALDI-FTICR-MS imaging of healthy rat liver tissue. (A) Optical image of tissue section prior to matrix application. Negative-ion mode MALDI-FTICR-MS images showing the distribution of selected molecular species in the (B) bile duct lumen ( $[\text{TCA-H}]^-$  at  $m/z$  514.2845), (C) connective tissue ( $[\text{PA (18:0}_{18:1})\text{-H}]^-$  at  $m/z$  701.5129), (D) parenchyma ( $[\text{PI (18:0}_{20:4})\text{-H}]^-$  at  $m/z$  885.5499), (E) bile duct ( $[\text{ST-OH (18:1}_{24:0})\text{-H}]^-$  at  $m/z$  906.6348) and (F) overlay of the selected species. (Designated masses are from MALDI-FTICR-MS imaging measurements, field of view 4352 pixels, area 1 mm<sup>2</sup> and spatial resolution 15 μm. Images normalized with TIC).

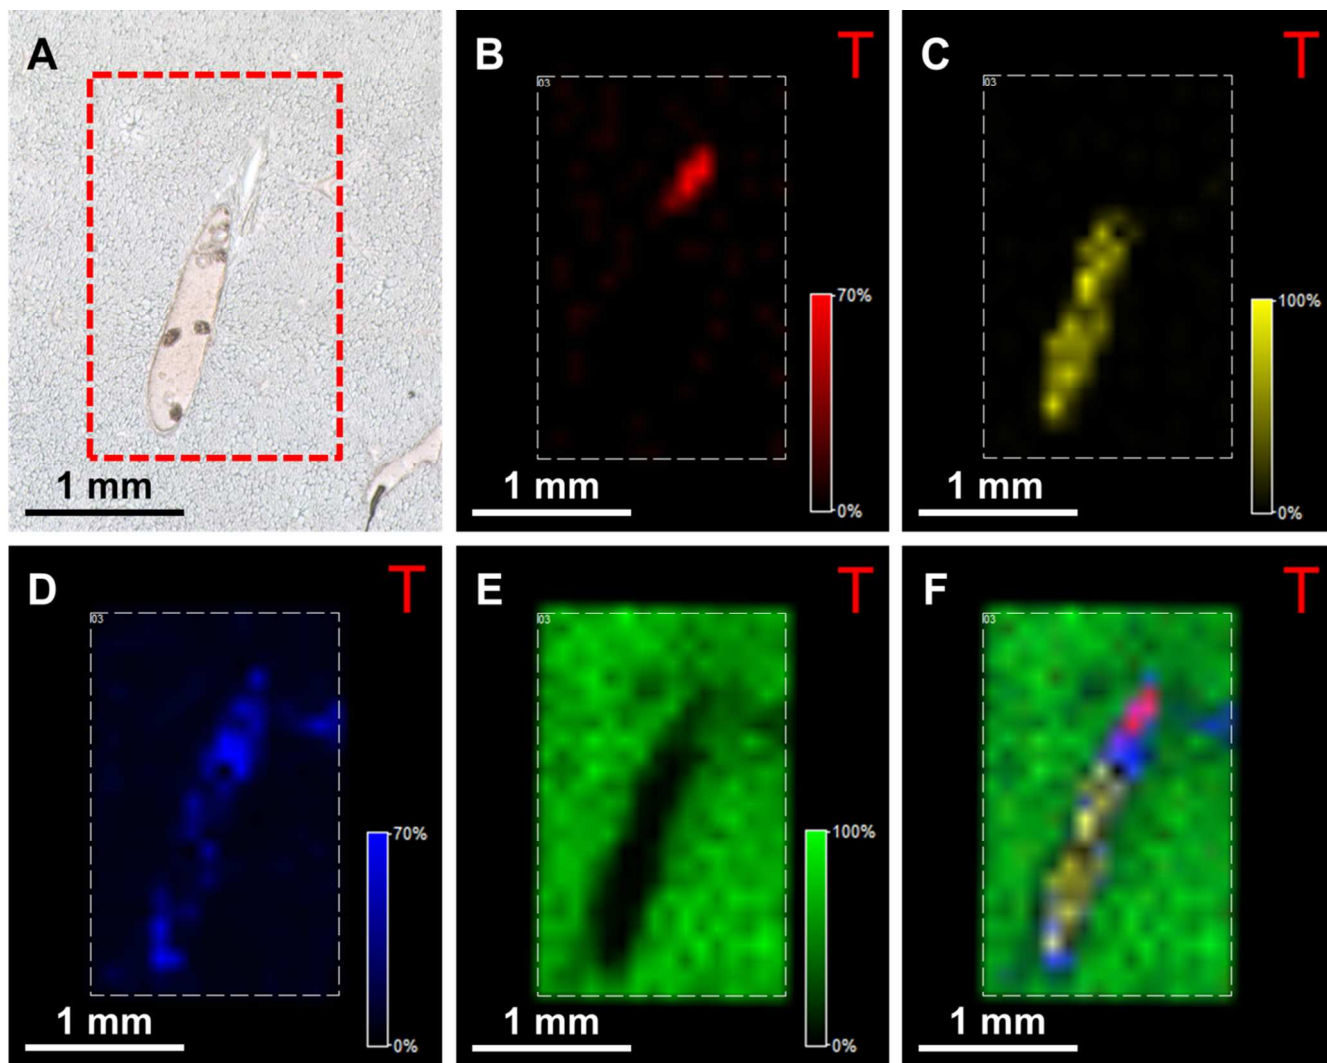

**Figure S13.** MALDI-FTICR-MS imaging of healthy rat liver tissue. (A) Optical image of tissue section prior to matrix application. Positive-ion mode MALDI-FTICR-MS images showing the distribution of selected molecular species in the (B) bile duct lumen (unknown at  $m/z$  560.2414), (C) heme ( $[M]^+$ ) at  $m/z$  616.1775, (D) connective tissue ( $[PC (32:0)+K]^+$ ) at  $m/z$  772.5254), (E) parenchyma ( $[PC (38:4)+K]^+$ ) at  $m/z$  848.5566) and (F) overlay of the selected species. (Designated masses are from MALDI-FTICR-MS imaging measurements, field of view 400 pixels, area  $3.8 \text{ mm}^2$  and spatial resolution  $100 \mu\text{m}$ . Images normalized with TIC).

| <i>Sample</i>   | <i>Bilirubin (umol/L)</i> | <i>ALT (U/L)</i> | <i>AST (U/L)</i> | <i>ALP (U/L)</i> | <i>GGT (U/L)</i> | <i>INR</i> |
|-----------------|---------------------------|------------------|------------------|------------------|------------------|------------|
| 1 (mild)        | 15                        | 15               | 19               | N/A              | 21               | 1.05       |
| 2 (severe)      | 48*                       | 76*              | 79*              | 365*             | 229*             | 1.1        |
| 3 (mild)        | 7                         | 48*              | 56*              | 52               | 61*              | N/A        |
| 4 (mild/severe) | 56*                       | 39               | 46*              | 110              | 21               | 1.6*       |
| 5 (severe)      | 80*                       | 56*              | 83*              | 373*             | 146*             | N/A        |
| 6 (severe)      | 147*                      | 157*             | 258*             | 240*             | 104*             | 1.4*       |

Key: Alanine aminotransferase (ALT), aspartate aminotransferase (AST), alkaline phosphatase (ALP), gamma glutamyltransferase (GGT), international normalized ratio (INR). \* Represents values above the reference range.

**Table S1.** Serum biochemistry of PSC patients.

| CONNECTIVE TISSUE |           |                                               |               | PARENCHYMA |           |                                               |               | CONNECTIVE TISSUE |           |                                               |               | PARENCHYMA |           |                                               |                                               |
|-------------------|-----------|-----------------------------------------------|---------------|------------|-----------|-----------------------------------------------|---------------|-------------------|-----------|-----------------------------------------------|---------------|------------|-----------|-----------------------------------------------|-----------------------------------------------|
| Mass              | Intensity | Identification                                | Formula       | Mass       | Intensity | Identification                                | Formula       | Mass              | Intensity | Identification                                | Formula       | Mass       | Intensity | Identification                                | Formula                                       |
| 741.5309          | 2.36E+10  | ISM (34:1)H <sup>+</sup> K <sup>+</sup>       | C39H79N2O6PNa | 741.5308   | 1.34E+10  | ISM (34:1)H <sup>+</sup> K <sup>+</sup>       | C39H79N2O6PNa | 725.5570          | 1.61E+10  | ISM (34:1)H <sup>+</sup> Na <sup>+</sup>      | C39H79N2O6PNa | 832.5825   | 1.27E+09  | IPC (34:1)H <sup>+</sup> K <sup>+</sup>       | C42H82NO8PNa                                  |
| 851.6399          | 2.34E+10  | C47H93N2O6PNa                                 | C47H93N2O6PNa | 772.5251   | 1.05E+10  | IPC (32:0)H <sup>+</sup> K <sup>+</sup>       | C40H80NO8PNa  | 756.5518          | 7.65E+09  | IPC (32:0)H <sup>+</sup> Na <sup>+</sup>      | C40H80NO8PNa  | 848.5564   | 4.68E+09  | IPC (38:4)H <sup>+</sup> K <sup>+</sup>       | C46H84NO8PNa                                  |
| 725.5568          | 2.24E+10  | ISM (34:1)H <sup>+</sup> Na <sup>+</sup>      | C39H79N2O6PNa | 851.6407   | 8.95E+09  | ISM (42:2)H <sup>+</sup> K <sup>+</sup>       | C47H93N2O6PNa | 835.6663          | 7.47E+09  | ISM (42:2)H <sup>+</sup> Na <sup>+</sup>      | C47H93N2O6PNa | 810.6008   | 2.93E+09  | IPC (18:0) 20:4)H <sup>+</sup> H <sup>+</sup> | IPC (18:0) 20:4)H <sup>+</sup> H <sup>+</sup> |
| 835.6658          | 2.03E+10  | ISM (42:2)H <sup>+</sup> Na <sup>+</sup>      | C47H93N2O6PNa | 725.5569   | 7.83E+09  | ISM (34:1)H <sup>+</sup> Na <sup>+</sup>      | C39H79N2O6PNa | 741.5311          | 6.84E+09  | ISM (34:1)H <sup>+</sup> K <sup>+</sup>       | C39H79N2O6PNa | 792.5690   | 2.23E+09  | IPC (16:0) 20:4)H <sup>+</sup> H <sup>+</sup> | IPC (16:0) 20:4)H <sup>+</sup> H <sup>+</sup> |
| 772.5254          | 1.96E+10  | IPC (32:0)H <sup>+</sup> K <sup>+</sup>       | C40H80NO8PNa  | 756.5518   | 6.50E+09  | IPC (32:0)H <sup>+</sup> Na <sup>+</sup>      | C40H80NO8PNa  | 753.5896          | 5.34E+09  | ISM (36:1)H <sup>+</sup> Na <sup>+</sup>      | C41H83NO8PNa  | 796.5293   | 1.98E+09  | IPC (34:2)H <sup>+</sup> K <sup>+</sup>       | IPC (34:2)H <sup>+</sup> K <sup>+</sup>       |
| 756.5508          | 1.59E+10  | IPC (32:0)H <sup>+</sup> Na <sup>+</sup>      | C40H80NO8PNa  | 825.6243   | 5.95E+09  | IPC (40:1)H <sup>+</sup> K <sup>+</sup>       | C45H91N2O6PNa | 808.6510          | 4.44E+09  | ISM (40:1)H <sup>+</sup> Na <sup>+</sup>      | C40H80NO8PNa  | 846.5413   | 1.55E+09  | IPC (38:5)H <sup>+</sup> K <sup>+</sup>       | IPC (38:5)H <sup>+</sup> K <sup>+</sup>       |
| 734.5691          | 7.59E+09  | IPC (16:0) 16:0)H <sup>+</sup> H <sup>+</sup> | C40H81NO8PNa  | 835.6659   | 4.80E+09  | ISM (40:1)H <sup>+</sup> K <sup>+</sup>       | C45H91N2O6PNa | 851.6405          | 3.64E+09  | ISM (42:2)H <sup>+</sup> K <sup>+</sup>       | C47H93N2O6PNa | 824.5565   | 1.54E+09  | IPC (38:6)H <sup>+</sup> K <sup>+</sup>       | IPC (38:6)H <sup>+</sup> K <sup>+</sup>       |
| 703.5749          | 6.53E+09  | ISM (18:1) 16:0)H <sup>+</sup> H <sup>+</sup> | C39H80N2O6PNa | 734.5694   | 4.77E+09  | IPC (16:0) 16:0)H <sup>+</sup> H <sup>+</sup> | C40H81NO8PNa  | 703.5750          | 3.34E+09  | IPC (16:0) 16:0)H <sup>+</sup> H <sup>+</sup> | C39H80N2O6PNa | 844.5293   | 1.51E+09  | IPC (38:4)H <sup>+</sup> Na <sup>+</sup>      | IPC (38:4)H <sup>+</sup> Na <sup>+</sup>      |
| 769.5626          | 6.18E+09  | ISM (36:1)H <sup>+</sup> K <sup>+</sup>       | C41H83NO8PNa  | 703.5744   | 3.78E+09  | ISM (18:1) 16:0)H <sup>+</sup> H <sup>+</sup> | C39H80N2O6PNa | 800.5570          | 3.89E+08  | IPC (34:0)H <sup>+</sup> K <sup>+</sup>       | C41H83NO8PNa  | 832.5827   | 1.45E+09  | IPC (38:4)H <sup>+</sup> Na <sup>+</sup>      | IPC (38:4)H <sup>+</sup> Na <sup>+</sup>      |
| 762.6005          | 8.07E+08  | IPC (16:0) 18:0)H <sup>+</sup> H <sup>+</sup> | C42H85NO8PNa  | 809.6505   | 3.21E+09  | ISM (40:1)H <sup>+</sup> Na <sup>+</sup>      | C45H91N2O6PNa | 820.5255          | 2.81E+10  | IPC (36:4)H <sup>+</sup> K <sup>+</sup>       | C44H80NO8PNa  | 796.5409   | 1.27E+09  | IPC (34:1)H <sup>+</sup> K <sup>+</sup>       | IPC (34:1)H <sup>+</sup> K <sup>+</sup>       |

  

| CONNECTIVE TISSUE |           |                                               |              | PARENCHYMA |           |                                               |              | CONNECTIVE TISSUE |           |                                               |               | PARENCHYMA |           |                                               |                                               |
|-------------------|-----------|-----------------------------------------------|--------------|------------|-----------|-----------------------------------------------|--------------|-------------------|-----------|-----------------------------------------------|---------------|------------|-----------|-----------------------------------------------|-----------------------------------------------|
| Mass              | Intensity | Identification                                | Formula      | Mass       | Intensity | Identification                                | Formula      | Mass              | Intensity | Identification                                | Formula       | Mass       | Intensity | Identification                                | Formula                                       |
| 796.5252          | 2.54E+11  | IPC (34:2)H <sup>+</sup> K <sup>+</sup>       | C42H80NO8PNa | 796.5254   | 8.38E+10  | IPC (34:2)H <sup>+</sup> K <sup>+</sup>       | C42H80NO8PNa | 725.5570          | 1.61E+10  | ISM (34:1)H <sup>+</sup> Na <sup>+</sup>      | C39H79N2O6PNa | 772.5254   | 4.68E+08  | IPC (32:0)H <sup>+</sup> K <sup>+</sup>       | C40H80NO8PNa                                  |
| 789.5410          | 1.44E+11  | IPC (34:1)H <sup>+</sup> K <sup>+</sup>       | C42H80NO8PNa | 782.5692   | 1.39E+10  | IPC (16:0) 20:4)H <sup>+</sup> H <sup>+</sup> | C42H81NO8PNa | 756.5518          | 7.65E+09  | IPC (32:0)H <sup>+</sup> Na <sup>+</sup>      | C40H80NO8PNa  | 851.6403   | 3.17E+08  | ISM (42:2)H <sup>+</sup> K <sup>+</sup>       | C47H93N2O6PNa                                 |
| 780.5513          | 1.42E+11  | IPC (34:2)H <sup>+</sup> Na <sup>+</sup>      | C42H80NO8PNa | 798.5410   | 1.33E+10  | IPC (34:1)H <sup>+</sup> K <sup>+</sup>       | C44H80NO8PNa | 741.5311          | 6.84E+09  | ISM (34:1)H <sup>+</sup> K <sup>+</sup>       | C39H79N2O6PNa | 734.5694   | 2.85E+08  | IPC (16:0) 18:0)H <sup>+</sup> H <sup>+</sup> | IPC (16:0) 18:0)H <sup>+</sup> H <sup>+</sup> |
| 824.5561          | 1.11E+11  | IPC (36:2)H <sup>+</sup> K <sup>+</sup>       | C44H80NO8PNa | 780.5514   | 1.24E+10  | IPC (36:4)H <sup>+</sup> K <sup>+</sup>       | C44H80NO8PNa | 753.5896          | 5.34E+09  | ISM (36:1)H <sup>+</sup> Na <sup>+</sup>      | C41H83NO8PNa  | 825.6249   | 2.24E+08  | ISM (40:1)H <sup>+</sup> K <sup>+</sup>       | ISM (40:1)H <sup>+</sup> K <sup>+</sup>       |
| 820.5248          | 8.76E+10  | IPC (18:0) 20:5)H <sup>+</sup> H <sup>+</sup> | C46H83NO8PNa | 808.5851   | 9.35E+09  | IPC (18:0) 20:5)H <sup>+</sup> H <sup>+</sup> | C46H83NO8PNa | 808.6510          | 4.44E+09  | ISM (40:1)H <sup>+</sup> Na <sup>+</sup>      | C40H80NO8PNa  | 756.5515   | 1.74E+08  | IPC (32:0)H <sup>+</sup> Na <sup>+</sup>      | IPC (32:0)H <sup>+</sup> Na <sup>+</sup>      |
| 808.5847          | 7.15E+10  | IPC (16:0) 18:2)H <sup>+</sup> H <sup>+</sup> | C44H82NO8PNa | 824.5512   | 5.17E+09  | IPC (36:2)H <sup>+</sup> K <sup>+</sup>       | C44H82NO8PNa | 851.6405          | 3.64E+09  | ISM (42:2)H <sup>+</sup> K <sup>+</sup>       | C47H93N2O6PNa | 725.5568   | 1.38E+08  | ISM (34:1)H <sup>+</sup> Na <sup>+</sup>      | ISM (34:1)H <sup>+</sup> Na <sup>+</sup>      |
| 758.5695          | 7.15E+10  | IPC (16:0) 18:2)H <sup>+</sup> H <sup>+</sup> | C44H82NO8PNa | 804.5512   | 5.72E+09  | IPC (36:4)H <sup>+</sup> Na <sup>+</sup>      | C44H83NO8PNa | 772.5254          | 3.34E+09  | IPC (32:0)H <sup>+</sup> K <sup>+</sup>       | C40H80NO8PNa  | 800.5569   | 1.13E+08  | IPC (34:0)H <sup>+</sup> K <sup>+</sup>       | IPC (34:0)H <sup>+</sup> K <sup>+</sup>       |
| 822.5406          | 6.76E+10  | IPC (36:3)H <sup>+</sup> K <sup>+</sup>       | C44H83NO8PNa | 820.5252   | 5.86E+09  | IPC (36:4)H <sup>+</sup> K <sup>+</sup>       | C44H83NO8PNa | 703.5750          | 3.02E+09  | ISM (18:1) 16:0)H <sup>+</sup> H <sup>+</sup> | C41H83NO8PNa  | 769.5623   | 8.69E+07  | ISM (36:1)H <sup>+</sup> K <sup>+</sup>       | ISM (36:1)H <sup>+</sup> K <sup>+</sup>       |
| 806.5672          | 4.83E+10  | IPC (36:3)H <sup>+</sup> Na <sup>+</sup>      | C44H83NO8PNa | 822.5411   | 4.79E+09  | IPC (36:3)H <sup>+</sup> K <sup>+</sup>       | C44H82NO8PNa | 734.5695          | 3.02E+09  | IPC (16:0) 16:0)H <sup>+</sup> H <sup>+</sup> | C42H85NO8PNa  | 762.6008   | 4.30E+07  | IPC (16:0) 16:0)H <sup>+</sup> H <sup>+</sup> | IPC (16:0) 16:0)H <sup>+</sup> H <sup>+</sup> |
| 848.5562          | 4.53E+10  | IPC (38:4)H <sup>+</sup> K <sup>+</sup>       | C46H84NO8PNa | 760.5851   | 4.49E+09  | IPC (16:0) 18:1)H <sup>+</sup> H <sup>+</sup> | C42H83NO8PNa |                   |           |                                               |               |            |           |                                               |                                               |

  

| CONNECTIVE TISSUE |           |                                               |              | PARENCHYMA |           |                                               |              | CONNECTIVE TISSUE |           |                                               |               | PARENCHYMA |           |                                               |                                               |
|-------------------|-----------|-----------------------------------------------|--------------|------------|-----------|-----------------------------------------------|--------------|-------------------|-----------|-----------------------------------------------|---------------|------------|-----------|-----------------------------------------------|-----------------------------------------------|
| Mass              | Intensity | Identification                                | Formula      | Mass       | Intensity | Identification                                | Formula      | Mass              | Intensity | Identification                                | Formula       | Mass       | Intensity | Identification                                | Formula                                       |
| 796.5252          | 2.54E+11  | IPC (34:2)H <sup>+</sup> K <sup>+</sup>       | C42H80NO8PNa | 796.5254   | 8.38E+10  | IPC (34:2)H <sup>+</sup> K <sup>+</sup>       | C42H80NO8PNa | 725.5570          | 1.61E+10  | ISM (34:1)H <sup>+</sup> Na <sup>+</sup>      | C39H79N2O6PNa | 772.5254   | 4.68E+08  | IPC (32:0)H <sup>+</sup> K <sup>+</sup>       | C40H80NO8PNa                                  |
| 789.5410          | 1.44E+11  | IPC (34:1)H <sup>+</sup> K <sup>+</sup>       | C42H80NO8PNa | 782.5692   | 1.39E+10  | IPC (16:0) 20:4)H <sup>+</sup> H <sup>+</sup> | C42H81NO8PNa | 756.5518          | 7.65E+09  | IPC (32:0)H <sup>+</sup> Na <sup>+</sup>      | C40H80NO8PNa  | 851.6403   | 3.17E+08  | ISM (42:2)H <sup>+</sup> K <sup>+</sup>       | C47H93N2O6PNa                                 |
| 780.5513          | 1.42E+11  | IPC (34:2)H <sup>+</sup> Na <sup>+</sup>      | C42H80NO8PNa | 798.5410   | 1.33E+10  | IPC (34:1)H <sup>+</sup> K <sup>+</sup>       | C44H80NO8PNa | 741.5311          | 6.84E+09  | ISM (34:1)H <sup>+</sup> K <sup>+</sup>       | C39H79N2O6PNa | 734.5694   | 2.85E+08  | IPC (16:0) 18:0)H <sup>+</sup> H <sup>+</sup> | IPC (16:0) 18:0)H <sup>+</sup> H <sup>+</sup> |
| 824.5561          | 1.11E+11  | IPC (36:2)H <sup>+</sup> K <sup>+</sup>       | C44H80NO8PNa | 780.5514   | 1.24E+10  | IPC (36:4)H <sup>+</sup> K <sup>+</sup>       | C44H80NO8PNa | 753.5896          | 5.34E+09  | ISM (36:1)H <sup>+</sup> Na <sup>+</sup>      | C41H83NO8PNa  | 825.6249   | 2.24E+08  | ISM (40:1)H <sup>+</sup> K <sup>+</sup>       | ISM (40:1)H <sup>+</sup> K <sup>+</sup>       |
| 820.5248          | 8.76E+10  | IPC (18:0) 20:5)H <sup>+</sup> H <sup>+</sup> | C46H83NO8PNa | 808.5851   | 9.35E+09  | IPC (18:0) 20:5)H <sup>+</sup> H <sup>+</sup> | C46H83NO8PNa | 808.6510          | 4.44E+09  | ISM (40:1)H <sup>+</sup> Na <sup>+</sup>      | C40H80NO8PNa  | 756.5515   | 1.74E+08  | IPC (32:0)H <sup>+</sup> Na <sup>+</sup>      | IPC (32:0)H <sup>+</sup> Na <sup>+</sup>      |
| 808.5847          | 7.15E+10  | IPC (16:0) 18:2)H <sup>+</sup> H <sup>+</sup> | C44H82NO8PNa | 824.5512   | 5.17E+09  | IPC (36:2)H <sup>+</sup> K <sup>+</sup>       | C44H82NO8PNa | 851.6405          | 3.64E+09  | ISM (42:2)H <sup>+</sup> K <sup>+</sup>       | C47H93N2O6PNa | 725.5568   | 1.38E+08  | ISM (34:1)H <sup>+</sup> Na <sup>+</sup>      | ISM (34:1)H <sup>+</sup> Na <sup>+</sup>      |
| 758.5695          | 7.15E+10  | IPC (16:0) 18:2)H <sup>+</sup> H <sup>+</sup> | C44H82NO8PNa | 804.5512   | 5.72E+09  | IPC (36:4)H <sup>+</sup> Na <sup>+</sup>      | C44H83NO8PNa | 772.5254          | 3.34E+09  | IPC (32:0)H <sup>+</sup> K <sup>+</sup>       | C40H80NO8PNa  | 800.5569   | 1.13E+08  | IPC (34:0)H <sup>+</sup> K <sup>+</sup>       | IPC (34:0)H <sup>+</sup> K <sup>+</sup>       |
| 822.5406          | 6.76E+10  | IPC (36:3)H <sup>+</sup> K <sup>+</sup>       | C44H83NO8PNa | 820.5252   | 5.86E+09  | IPC (36:4)H <sup>+</sup> K <sup>+</sup>       | C44H83NO8PNa | 703.5750          | 3.02E+09  | ISM (18:1) 16:0)H <sup>+</sup> H <sup>+</sup> | C41H83NO8PNa  | 769.5623   | 8.69E+07  | ISM (36:1)H <sup>+</sup> K <sup>+</sup>       | ISM (36:1)H <sup>+</sup> K <sup>+</sup>       |
| 806.5672          | 4.83E+10  | IPC (36:3)H <sup>+</sup> Na <sup>+</sup>      | C44H83NO8PNa | 822.5411   | 4.79E+09  | IPC (36:3)H <sup>+</sup> K <sup>+</sup>       | C44H82NO8PNa | 734.5695          | 3.02E+09  | IPC (16:0) 16:0)H <sup>+</sup> H <sup>+</sup> | C42H85NO8PNa  | 762.6008   | 4.30E+07  | IPC (16:0) 16:0)H <sup>+</sup> H <sup>+</sup> | IPC (16:0) 16:0)H <sup>+</sup> H <sup>+</sup> |
| 848.5562          | 4.53E+10  | IPC (38:4)H <sup>+</sup> K <sup>+</sup>       | C46H84NO8PNa | 760.5851   | 4.49E+09  | IPC (16:0) 18:1)H <sup>+</sup> H <sup>+</sup> | C42H83NO8PNa |                   |           |                                               |               |            |           |                                               |                                               |

Table S2. Comparison of lipids present in the different areas of the liver across different species in positive ion mode.



| <i>Identity</i>                    | <i>Mass</i> | <i>ROC value</i> |
|------------------------------------|-------------|------------------|
| [TCDCA/TDCA-H] <sup>-</sup>        | 498,2896    | 0.626            |
| [TCA-H] <sup>-</sup>               | 514,2844    | 0.721            |
| [Bilirubin-H] <sup>-</sup>         | 583,2561    | 0.568            |
| [PS (18:0-18:1)-H] <sup>-</sup>    | 788,5449    | 0.684            |
| [PI (18:0-18:2)-H] <sup>-</sup>    | 861,5502    | 0.551            |
| [ST-OH (18:1-24:0)-H] <sup>-</sup> | 906,6352    | 0.439            |

**Table S4.** ROC values for other molecular markers.
